# Supplementary material for: Pd/C-Based Sensor for Gas Sensing in Transformer Oil
Source: MDPI journal article supplement (doi:10.3390/catal13071113), 2023-07-17
Supplement: s1 [file s1]

# Pd/C-based Sensor for Gas Sensing in Transformer Oil

Haidan Lin<sup>1</sup>, Jiachang Guo<sup>1</sup>, Daiyong Yang<sup>3</sup>, Shouxue Li<sup>1</sup>, Dan Liu<sup>3</sup>, Changyan Liu<sup>1</sup>, Zilong Zhang<sup>2</sup>, Bolin Wang<sup>2,\*</sup>, Haifeng Zhang<sup>2,\*</sup>

1 Electric Power Research Institute, State Grid Jilin Electric Power Co., Ltd., Changchun, 130012, China; a125790709@163.com (H.L.); 1325377991@163.com (J.G.); X13629890704@163.com (S.L.); W8551191546@163.com (C.L.);

2 School of Chemical Engineering, Northeast Electric Power University, Jilin 132012, China; zilongzhang\_neepu@163.com (Z.Z.);

3 Jilin Electric Power Research Institute Co., Ltd., Changchun, 130012, China; SR17662744213@163.com (D.Y.); a1772681@163.com (D.L.);

\* Correspondence: bolinwang@neepu.edu.cn (B.W.); zhfeepu@163.com(H.Z.)

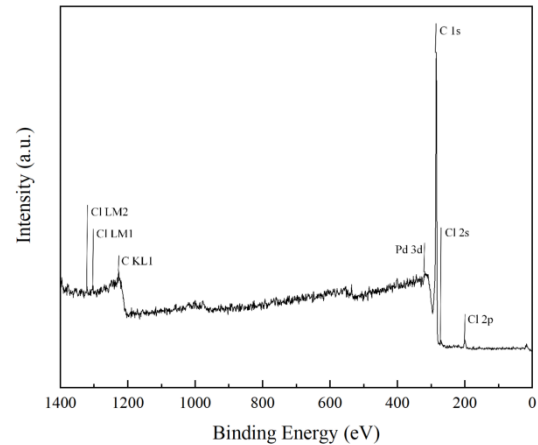

Figure S1 The survey XPS spectra of Pd-C.

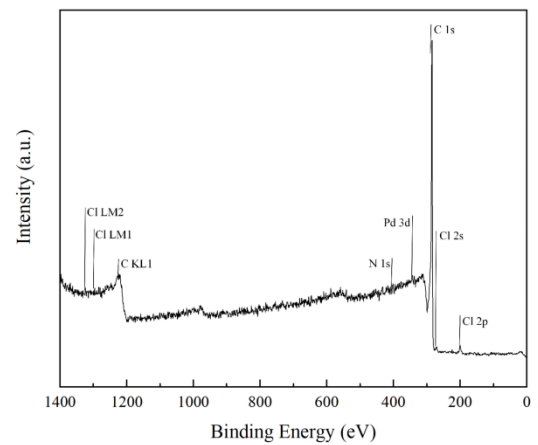

Figure S2 The survey XPS spectra of Pd-NC.

Table S1 The split peaks processing information of Pd/C.

| Peak | Position BE | FWHM | RSF | Atomic | <i>Atomic</i> | <i>Mass</i> |
|------|-------------|------|-----|--------|---------------|-------------|
|------|-------------|------|-----|--------|---------------|-------------|

|       | (eV)    | (eV)  |       | Mass    | <u>Conc%</u> | <u>Conc%</u> |
|-------|---------|-------|-------|---------|--------------|--------------|
| C 1s  | 284.500 | 1.394 | 0.278 | 12.011  | <u>98.9</u>  | <u>95.9</u>  |
| Cl 2p | 199.700 | 1.579 | 0.891 | 35.460  | <u>1.0</u>   | <u>2.9</u>   |
| Pd 3d | 336.800 | 0.889 | 5.356 | 106.534 | <u>0.1</u>   | <u>1.2</u>   |

Table S2 The split peaks processing information of Pd/NC.

| Peak  | Position BE | FWHM  | RSF   | Atomic  | <u>Atomic</u> | <u>Mass</u>  |
|-------|-------------|-------|-------|---------|---------------|--------------|
|       | (eV)        | (eV)  |       | Mass    | <u>Conc%</u>  | <u>Conc%</u> |
| C 1s  | 284.550     | 1.613 | 0.278 | 12.011  | <u>97.4</u>   | <u>94.0</u>  |
| Cl 2p | 200.500     | 2.030 | 0.891 | 35.460  | <u>1.3</u>    | <u>3.8</u>   |
| N 1s  | 400.750     | 0.677 | 0.477 | 14.007  | <u>1.2</u>    | <u>1.3</u>   |
| Pd 3d | 337.400     | 0.784 | 5.356 | 106.534 | <u>0.1</u>    | <u>0.9</u>   |

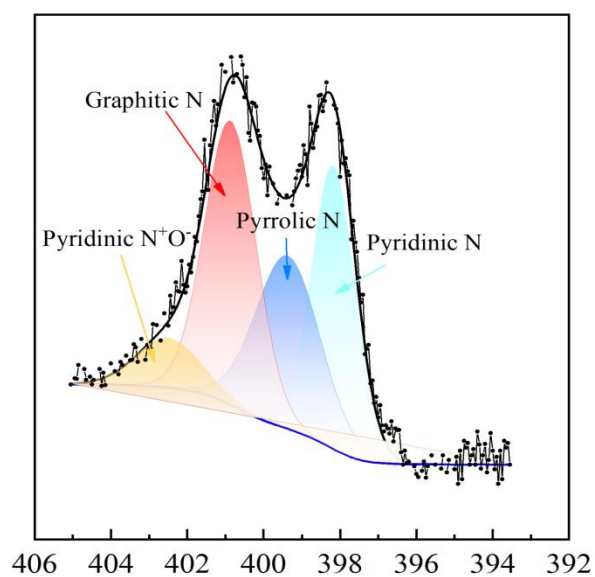

Figure S3 The N1s spectrum for Pb/NC.
